# Supplementary material
Source: PubMed Central journal article supplement (PMC3320724)
Supplement: NIHMS365164-supplement-supplement_1.pdf [file NIHMS365164-supplement-supplement_1.pdf]

**Web Appendix Table A1: Baseline Determinants of Total HDL-P Changes (baseline-to-month 6) among Participants Initiating ART (VS group; n=128)**

| Covariate                                         | Models for Change in Log-e Total HDL-P |         |                 |         |
|---------------------------------------------------|----------------------------------------|---------|-----------------|---------|
|                                                   | Univariate                             |         | Multivariate    |         |
|                                                   | Reg. Coeff (SE)                        | p-value | Reg. Coeff (SE) | p-value |
| Baseline Total HDL-P (per log-e nmol/L)           | -0.74 (0.07)                           | <0.001  | -0.67 (0.07)    | <0.001  |
| Age (per 10 years older)                          | 0.01 (0.03)                            | 0.70    | 0.00 (0.03)     | 0.92    |
| Female gender (vs. male)                          | 0.04 (0.06)                            | 0.49    | 0.06 (0.04)     | 0.19    |
| Black race (vs. other)                            | 0.03 (0.05)                            | 0.56    | 0.04 (0.04)     | 0.34    |
| Prior AIDS (vs. not)                              | 0.10 (0.07)                            | 0.17    | 0.19 (0.05)     | <0.001  |
| ART naïve (vs. not)                               | -0.06 (0.05)                           | 0.22    | 0.00 (0.04)     | 0.90    |
| CD4+ count (per 100 cells/mm <sup>3</sup> higher) | 0.03 (0.01)                            | 0.09    | 0.02 (0.01)     | 0.15    |
| Baseline HIV RNA (per log-10 copies/mL)           | 0.03 (0.03)                            | 0.36    | -0.03 (0.03)    | 0.29    |
| Hepatitis B or C co-infection (vs. not)           | -0.02 (0.06)                           | 0.76    | -0.06 (0.05)    | 0.17    |
| Current smoker (vs. not)                          | 0.07 (0.05)                            | 0.20    | 0.04 (0.04)     | 0.35    |
| Body mass index (per kg/m <sup>2</sup> higher)    | -0.01 (0.00)                           | 0.16    | -0.01 (0.00)    | 0.13    |
| Diabetes (vs. not)                                | 0.07 (0.11)                            | 0.56    | 0.11 (0.09)     | 0.23    |
| Blood pressure-lowering therapy (vs. not)         | 0.02 (0.07)                            | 0.76    | 0.03 (0.06)     | 0.57    |
| Lipid-lowering therapy (vs. not)                  | 0.13 (0.11)                            | 0.21    | 0.06 (0.08)     | 0.46    |
| Baseline LDL-C level (per 10 mg/dL)               | -0.03 (0.01)                           | 0.002   | -0.01 (0.01)    | 0.11    |
| Baseline triglycerides (per 10 mg/dL)             | 0.00 (0.00)                            | 0.46    | 0.00 (0.00)     | 0.31    |
| Baseline hsCRP level (per log-e µg/mL)            | 0.07 (0.02)                            | <0.001  | 0.05 (0.02)     | 0.004   |
| Baseline IL-6 level (per log-e pg/mL)             | 0.09 (0.03)                            | 0.008   | -0.06 (0.03)    | 0.05    |
| Baseline D-dimer level (per log-e µg/mL)          | 0.07 (0.03)                            | 0.03    | -0.01 (0.03)    | 0.68    |
| Started NNRTI-based ART (vs. other)               | 0.13 (0.05)                            | 0.01    | 0.12 (0.04)     | 0.003   |

*HDL-P = high-density lipoprotein particle concentration; ART = antiretroviral therapy; LDL-C = low-density lipoprotein cholesterol; hsCRP = high sensitivity C-reactive protein; IL-6 = interleukin-6; NNRTI = non-nucleoside reverse transcriptase inhibitor*

**Web Appendix Table A2: Baseline Determinants of ApoA1 Changes (baseline-to-month 6) among Participants Initiating ART (VS group; n=116\*)**

| Covariate                                         | Models for Change in Log-e ApoA1 |         |                 |         |
|---------------------------------------------------|----------------------------------|---------|-----------------|---------|
|                                                   | Univariate                       |         | Multivariate    |         |
|                                                   | Reg. Coeff (SE)                  | p-value | Reg. Coeff (SE) | p-value |
| Baseline ApoA1 (per log-e g/L)                    | -0.90 (0.07)                     | <0.001) | -0.84 (0.07)    | <0.001  |
| Age (per 10 years older)                          | 0.01 (0.03)                      | 0.71    | 0.03 (0.02)     | 0.25    |
| Female gender (vs. male)                          | 0.03 (0.06)                      | 0.59    | 0.10 (0.04)     | 0.02    |
| Black race (vs. other)                            | 0.11 (0.06)                      | 0.06    | 0.05 (0.04)     | 0.19    |
| Prior AIDS (vs. not)                              | 0.13 (0.08)                      | 0.09    | 0.12 (0.05)     | 0.02    |
| ART naïve (vs. not)                               | 0.02 (0.06)                      | 0.71    | 0.07 (0.04)     | 0.07    |
| CD4+ count (per 100 cells/mm <sup>3</sup> higher) | 0.01 (0.02)                      | 0.35    | 0.01 (0.01)     | 0.48    |
| Baseline HIV RNA (per log-10 copies/mL)           | 0.00 (0.04)                      | 0.96    | -0.04 (0.02)    | 0.11    |
| Hepatitis B or C co-infection (vs. not)           | 0.09 (0.07)                      | 0.18    | 0.02 (0.04)     | 0.73    |
| Current smoker (vs. not)                          | 0.01 (0.06)                      | 0.80    | 0.05 (0.04)     | 0.15    |
| Body mass index (per kg/m <sup>2</sup> higher)    | -0.01 (0.00)                     | 0.12    | -0.01 (0.00)    | 0.14    |
| Diabetes (vs. not)                                | 0.02 (0.12)                      | 0.86    | 0.02 (0.08)     | 0.84    |
| Blood pressure-lowering therapy (vs. not)         | 0.04 (0.07)                      | 0.58    | 0.05 (0.06)     | 0.41    |
| Lipid-lowering therapy (vs. not)                  | 0.10 (0.12)                      | 0.38    | -0.02 (0.08)    | 0.79    |
| Baseline LDL-C level (per 10 mg/dL)               | -0.03 (0.01)                     | 0.001   | -0.02 (0.01)    | 0.01    |
| Baseline triglycerides (per 10 mg/dL)             | 0.00 (0.00)                      | 0.31    | 0.00 (0.00)     | 0.07    |
| Baseline hsCRP level (per log-e µg/mL)            | 0.06 (0.02)                      | 0.002   | 0.05 (0.02)     | 0.002   |
| Baseline IL-6 level (per log-e pg/mL)             | 0.05 (0.04)                      | 0.15    | -0.06 (0.03)    | 0.05    |
| Baseline D-dimer level (per log-e µg/mL)          | 0.09 (0.03)                      | 0.01    | 0.01 (0.02)     | 0.80    |
| Started NNRTI-based ART (vs. other)               | 0.13 (0.06)                      | 0.03    | 0.11 (0.04)     | 0.004   |

\*ApoA1 levels only available on 116 of 128 in VS group.

HDL-P = high-density lipoprotein particle concentration; ART = antiretroviral therapy; LDL-C = low-density lipoprotein cholesterol; hsCRP = high sensitivity C-reactive protein; IL-6 = interleukin-6; NNRTI = non-nucleoside reverse transcriptase inhibitor
